# Supplementary material
Source: PubMed Central journal article supplement (PMC8163891)
Supplement: 41396_2020_888_MOESM1_ESM.pdf [file 41396_2020_888_MOESM1_ESM.pdf]

1 **Supplementary Information for**

2 **Unexpectedly high mutation rate of a deep-sea hyperthermophilic**  
3 **anaerobic archaeon**

4  
5 Jiahao Gu, Xiaojun Wang, Xiaopan Ma, Ying Sun, Xiang Xiao\*, Haiwei Luo\*

6  
7 \*Corresponding author.

8 Haiwei Luo ([hluo2006@gmail.com](mailto:hluo2006@gmail.com)), Xiang Xiao ([zjxiao2018@sjtu.edu.cn](mailto:zjxiao2018@sjtu.edu.cn))

9  
10  
11 **This PDF file includes:**

12 Supplementary Materials and Methods

13  
14 References  
15

## 16 **Materials and Methods**

### 17 *Sampling, cultivation, and genome sequencing of Thermococcus eurythermalis isolates*

18       Nine *Thermococcus eurythermalis* strains (Table S3) were isolated from samples of  
19 Guaymas Basin hydrothermal vents in the cruise number AT 15–55, during 7-17 November  
20 2009 [1]. Briefly, samples were stored in the Hungate anaerobic tubes and kept at 4°C. Then  
21 the samples were enriched at 85°C or 95°C using *Thermococcales* Rich Medium (TRM). One  
22 liter of TRM contains 3.3g pipes disodium salt, 23g NaCl, 5g MgCl<sub>2</sub>·6H<sub>2</sub>O, 0.7g KCl, 0.5g  
23 (NH<sub>4</sub>)<sub>2</sub>SO<sub>4</sub>, 1mL K<sub>2</sub>HPO<sub>4</sub> 5%, 1mL KH<sub>2</sub>PO<sub>4</sub> 5%, 1mL CaCl<sub>2</sub>·2H<sub>2</sub>O 2%, 0.05g NaBr, 0.01g  
24 SrCl<sub>2</sub>·6H<sub>2</sub>O, 1mL Na<sub>2</sub>WO<sub>4</sub> 10mM, 1mL FeCl<sub>3</sub> 25mM, 1g yeast extract, 4g tryptone and 1mg  
25 resazurin [2]. The medium was adjusted to pH 7.0, autoclaved and reduced with 0.5g sodium  
26 sulphide before use. Next, enrichment cultures were inoculated on the solid medium prepared  
27 with hungate roll-tube technique and incubated at 85°C or 95°C under atmosphere pressure.  
28 Single colonies were transferred into new TRM medium and purified using roll-tube  
29 technique for 3 times and stocks were kept at -80°C. More details of sampling and isolation  
30 can be found in a previous paper [1]. Among these isolates, the complete genome of the type  
31 strain A501 (GCA\_000769655.1) was downloaded from the NCBI GenBank database [3],  
32 and the rest eight strains were sequenced in the present study. To get enrichment of these  
33 eight strains, stocks kept in -80°C were inoculated into 50 mL anaerobic TRM medium in the  
34 serum bottle and cultured in the incubator in 85°C. The liquid medium was supplemented  
35 with sulfur and Na<sub>2</sub>S·9H<sub>2</sub>O. After enrichment, the cells were collected using centrifuge  
36 (12,000 rpm, 10min). Genomic DNA of each isolate was extracted using the Magen Hipure

37 Soil DNA Kit and was sequenced using the Illumina Hiseq platform with 2×150 bp paired-  
38 end. Raw reads were first processed by Trimmomatic 0.32 [4] to remove adaptors and trim  
39 bases of low quality. The draft genome of each isolate was assembled with quality reads  
40 using SPAdes v3.10.1 [5] with default parameters.

41

#### 42 *Mutation accumulation experiment*

43 For culture propagation under high temperature, anaerobic high-temperature-tolerant  
44 plates were made every day before the transfer. Plates were made using anaerobic  
45 *Thermococcus* Rich Medium [2] (TRM) with gelrite (15g liter<sup>-1</sup>). After sterilization, 1.5 mL  
46 of a polysulfide solution [6] was added per liter of medium using syringe to make sure a  
47 strictly anaerobic condition. The medium was transferred into an anaerobic chamber (COY,  
48 Vinyl Anaerobic Chamber) immediately, preventing it from cooling. This is because gelrite  
49 used for making plates becomes solidified soon after it become cooler. Plates were made in  
50 the chamber.

51 The mutation accumulation (MA) experiment started from a single founder colony of  
52 *Thermococcus eurythermalis* A501. It was transferred to new plates to form 100 independent  
53 lines. Plates were put into an anaerobic jar (GeneScience), which were together moved to an  
54 incubator. After incubation at 85°C under normal air pressure (optimal growth pressure from  
55 0.1-30 MPa) for one day, the jar was transferred back into the anaerobic chamber. Plates were  
56 then taken out. This was the initiation of the MA process. Caution was taken to ensure a  
57 strictly anaerobic condition maintained throughout the experiment. A single/tiny (< 1 mm)

58 colony of each line was carefully picked and transferred onto a new plate. Then the new  
59 plates were put back into the anaerobic jar for incubation. The single cell bottleneck of the  
60 MA process occurred during every transfer.

61 The MA propagation was completed following 20 transfers, and four MA lines were  
62 lost during the MA process. A single colony on each plate was transferred into 5 mL  
63 anaerobic TRM medium in the anaerobic chamber. The liquid medium was supplemented  
64 with sulfur and  $\text{Na}_2\text{S}\cdot 9\text{H}_2\text{O}$ . After incubation at  $85^\circ\text{C}$  for one day, stocks of each line were  
65 kept at  $-80^\circ\text{C}$ . Genomic DNA of each survived MA line was extracted using the Magen  
66 Hipure Soil DNA Kit and sequenced using the same platform mentioned above. A  
67 sequencing coverage depth of  $\sim 433\times$  with an average library fragment size of  $\sim 470$  bp was  
68 obtained for each line.

69

#### 70 *Generation time estimation with correction for cell death rate*

71 To estimate the generation time, a whole single colony was cut from 10 randomly  
72 selected MA lines. The selected 10 colonies each were moved into 5 mL anaerobic TRM  
73 medium supplemented with  $\text{Na}_2\text{S}\cdot 9\text{H}_2\text{O}$ . After dilution and re-plating, live cell density ( $d$ )  
74 was measured with viable cell counts. The live and dead cell staining was done to correct the  
75 total cell density for each colony. Briefly, to obtain the sufficient cell density for staining, ten  
76 single colonies were cut from every MA line selected above. Live and dead bacterial staining  
77 kit (Yeasen Biotech Co.) was used in this study. The kit was tested to be effective in archaea.  
78 The cells were put into 350  $\mu\text{L}$  anaerobic TRM medium supplemented with  $\text{Na}_2\text{S}\cdot 9\text{H}_2\text{O}$ .

79 After centrifuge with 10,000 g for 10 min, cells were resuspended in 50  $\mu$ L medium. Cell  
80 staining was done following the protocol of the kit. Fluorescence microscope (Nikon) was  
81 used to differentiate between live and dead cells. The ratio of live cells to total cells ( $r$ ) was  
82 0.942 ( $\pm$  0.095) (Table S5). The number of cell divisions per transfer ( $D$ ) was corrected by:

$$83 \quad D = \log_2\left(\frac{d}{r}\right)$$

84 where  $d$  is the live cell density and  $r$  is the ratio of live cells in total cells. The total number of  
85 generations that each MA line went through was the multiplication of average number of cell  
86 divisions per transfer and the total number of transfers. Since each MA line underwent 20  
87 transfers with an average of  $15.72 \pm 1.76$  cell divisions per transfer, there were a total of  
88  $314.4 \pm 35.2$  generations for each MA line.

89

#### 90 *Mutation calling and mutation rate determination*

91 Raw reads were first processed by Trimmomatic 0.32 [4] to remove adaptors and trim  
92 low-quality bases. Then the paired-end reads of 96 MA lines were individually mapped to the  
93 *T. eurythermalis* A501 reference genome using two different mappers: BWA-mem [7] and  
94 NOVOALIGN v2.08.02 ([www.novocraft.com](http://www.novocraft.com)). The resulting pileup files were converted to  
95 SAM format with SAMTOOLS [8].

96 The above mapping results were processed by Picard MarkDuplicates  
97 (<http://broadinstitute.github.io/picard/>) to remove duplicate reads which may arise during  
98 sample preparation like PCR duplication artifacts or derive from a single amplification  
99 cluster. Base quality score recalibration was performed to adjust quality score affected by

100 systematic technical errors using BaseRecalibrator in GATK-4.0 [9]. Then base substitutions  
101 and small indels were called using HaplotypeCaller implemented in GATK-4.0 [9]. Variants  
102 were further filtered with standard parameters described by GATK Best Practices  
103 recommendations, except that the Phred-scaled quality score  $QUAL > 100$  and RMS  
104 mapping quality  $MQ > 59$  were set, which followed previous studies [9–12]. PCR primers  
105 were designed with Primer Premier 5.0 [13] to confirm the presence of mutations identified  
106 by the above bioinformatics method. Twenty base substitutions and nine indels were sampled  
107 from 11 lines and validated. These lines were chosen because two of these lines showed the  
108 highest base-substitution mutation rate and the remaining nine lines showed the longest indel  
109 mutations (Table S1). The average number of analyzable sites and the average coverage per  
110 site in the *T. eurythermalis* A501 MA lines were 2,123,047 ( $\pm 674$ ) and 431 ( $\pm 57$ ),  
111 respectively.

112 The base-substitution mutation rate per nucleotide site per cell division ( $\mu$ ) for each  
113 line was calculated according to the following equation:

$$114 \quad \mu = \frac{m}{nG}$$

115 Where  $m$  is the number of observed base substitutions,  $n$  is the number of nucleotide sites  
116 analyzed, and  $G$  is the mean number of cell divisions estimated during the mutation  
117 accumulation process. Following a previous study [14], the total standard error of base-  
118 substitution mutation rate across all MA lines was calculated by:

$$119 \quad SE_{pooled} = \frac{s}{\sqrt{N}}$$

120 where  $s$  is the standard deviation of the mutation rate across all lines, and  $N$  is the number of  
121 lines analyzed.

122

### 123 *The effective population size estimation for *Thermococcus eurythermalis**

124 The effective population size ( $N_e$ ) of a prokaryotic species was calculated following the  
125 equation  $\pi_s = 2 \times N_e \times \mu$ , where  $\pi_s$  is the nucleotide diversity at silent (synonymous) sites among  
126 randomly sampled members of a species and  $\mu$  is the unbiased spontaneous mutation rate.

127 Microbial species commonly harbor genetically structured populations, which has a major  
128 influence on  $\pi_s$  and thus  $N_e$  estimation. It is therefore important to identify strains allowed for  
129 free recombination when calculating  $N_e$  for a prokaryotic species [15]. The recently available  
130 program PopCOGenT [16] identifies members from a prokaryotic species constituting a  
131 panmictic population. The basic idea of PopCOGenT is that the recent homologous  
132 recombination erased the single nucleotide polymorphisms (SNPs) and led to identical  
133 regions between genomes, and therefore strains subjected with frequent recent gene transfers  
134 are expected to show an enrichment of identical genomic regions compared to accumulation  
135 of SNPs between genomes lacking recent transfer [16]. In practice, strains were connected  
136 via recent gene flow into a network, and a putative population was identified as a cluster,  
137 with within-cluster DNA transfer frequency much higher than that of between clusters. Only  
138 one strain within each clonal complex was kept, which is also important for  $\pi_s$  estimation  
139 because an overuse of strains from a clonal complex is expected to underestimate  $\pi_s$ . Then  
140 the cluster containing the largest number of strains was chosen as the panmictic population

141 for a given species. In the case of *T. eurythermalis*, all nine strains together form a panmictic  
142 population, but two strains were not used in the calculation because they were repetitive  
143 members of clonal complexes.

144 Next, the single-copy orthologous genes shared by all the seven *T. eurythermalis*  
145 genomes were identified by OrthoFinder 2.2.1 [17]. Amino acid sequences of each gene  
146 family were aligned with MAFFT v7.464 [18] and then imposed on nucleotide sequences.  
147 The number of synonymous substitution per synonymous site ( $d_s$ ) for each possible gene pair  
148 in each gene family was computed with the YN00 program in PAML 4.9e [19]. The  $\pi_s$  of  
149 each gene family was obtained by averaging all pairwise  $d_s$  values, and then the median  $\pi_s$   
150 across all single-copy gene families together with  $\mu$  were used to calculate the  $N_e$ . We used  
151 the median  $\pi_s$  instead of the mean value, because loci showing unusually large  $d_s$  as a result  
152 of allelic replacement via homologous recombination with divergent lineages are common in  
153 marine prokaryotic species [20], which are expected to bias the mean value but have a limited  
154 effect on the median value across gene loci. Given the small sample size of the available *T.*  
155 *eurythermalis* genomes, bootstrap resampling (with replacement, 10,000 pseudoreplicates) of  
156 the genomes were conducted to estimate standard deviation (Table S4) of  $\pi_s$ .

157

#### 158 *Data synthesis*

159 To enable a comparative analysis of *T. eurythermalis* relative to other prokaryotic  
160 species, the available  $\mu$  values of other 29 prokaryotic species determined with the MA/WGS  
161 technique were collected from the literature (Table S4). Among these, 20 species each had



162 multiple isolates' genomes available from the NCBI Refseq database [21], and thus were  
163 used for  $N_e$  calculation. The calculation of  $N_e$  for these species followed the abovementioned  
164 procedure detailed for *T. eurythermalis*, which started with the identification of members  
165 constituting a panmictic population by PopCOGenT, followed by the calculation of  $\pi_S$ . The  
166 same bootstrap resampling analysis was performed to estimate the standard deviation of  $\pi_S$   
167 for another four species, each of which consists of less than 10 strains (Table S4). A few  
168 species have thousands of isolates' genomes available in Refseq (Table S4), which are not  
169 amenable for the PopCOGenT analysis. For these species, we started from the populations  
170 previously identified by ConSpeciFix [22, 23] and used these genomes as the input of  
171 PopCOGenT. The ConSpeciFix delineates populations based on homoplasious SNPs, which  
172 retains historical recombination signal and blurs the boundary of the ecological populations  
173 enriched with recent gene transfers [16]. In the case of the species *Ruegeria pomeroyi* DSS-3,  
174 a model heterotrophic marine bacterium with its mutation rate available [14], since closely  
175 related isolates has not been available, we turned to its closely related species *Epibacterium*  
176 *mobile* (previously known as *Ruegeria mobile*) with multiple isolates' genomes available.

177       Next, the pairwise linear relationship between  $\mu$ ,  $N_e$ , and genome size across the  
178 prokaryotic species was initially assessed with the generalized linear model (GLM)  
179 implemented in *stats* package in R v4.0.2 [24]. The Bonferonni adjusted outlier test was  
180 performed with *outlierTest* function in *car* package [25]. A data point with Bonferroni  $p$ -  
181 value smaller than 0.05 would be identified as the outlier. For  $\mu$  versus genome size, all 30  
182 species were used. In the case of  $N_e$  versus  $\mu$  and  $N_e$  versus genome size, only the 21 species

183 each containing multiple strains' genomes were used. To test whether there was a  
184 phylogenetic signal of these traits, the Pagel's  $\lambda$  [26] was estimated using the *pgls* function of  
185 the *caper* package [27] which took the phylogeny of 30 species or the phylogeny of 21  
186 species as an input. The species phylogeny was approximated by the 16S rRNA gene tree  
187 constructed using IQ-TREE 2.0 [28] with ModelFinder [29] which assigns the best  
188 substitution model and with 1,000 ultrafast bootstrap replicates. The value of  $\lambda$  ranges from 0  
189 to 1, with 0 indicating no phylogenetic signal and 1 indicating a strong phylogenetic signal  
190 due to Brownian motion. The  $p$  values for the lower and upper bounds represent whether the  
191  $\lambda$  is significantly different from 0 and 1, respectively. The results of this test indicate that  
192 there was an intermediate phylogenetic signal for the relationship of  $N_e$  versus  $\mu$  ( $\lambda = 0.81$ ,  
193 lower bound  $p = 0.29$ , upper bound  $p = 0.06$ ), but not for that of  $N_e$  versus genome size and  $\mu$   
194 versus genome size (in both cases,  $\lambda = 0$ , lower bound  $p = 1$ , upper bound  $p < 0.001$ ). To  
195 control for the phylogenetic effect on the correlations of the traits, the pairwise linear  
196 relationship between  $\mu$ ,  $N_e$ , and genome size was further assessed with the phylogenetic  
197 generalized least square (PGLS) regression implemented in the *caper* package [27] in R  
198 v4.0.2 [24]. The PGLS and GLM regression lines were largely overlapped for  $N_e$  versus  
199 genome size and  $\mu$  versus genome size (Fig. 2BC). This is because no phylogenetic signal  
200 was detected in these relationships. A data point was identified as an outlier in the PGLS  
201 result if the associated absolute value of studentized residual is greater than three [30, 31].

202 **References**

- 203 1. Liu L, Wang F, Xu J, Xiao X. Molecular diversity of *Thermococcales* isolated from  
204 Guaymas Basin hydrothermal vents. *Acta Oceanol Sin* 2013; **32**: 75–81.
- 205 2. Zeng X, Birrien J-L, Fouquet Y, Cherkashov G, Jebbar M, Querellou J, et al.  
206 *Pyrococcus* CH1, an obligate piezophilic hyperthermophile: extending the upper  
207 pressure-temperature limits for life. *ISME J* 2009; **3**: 873–876.
- 208 3. Benson DA, Karsch-Mizrachi I, Lipman DJ, Ostell J, Wheeler DL. GenBank. *Nucleic*  
209 *Acids Res* 2007; **35**: D21–D25.
- 210 4. Bolger AM, Lohse M, Usadel B. Trimmomatic: a flexible trimmer for Illumina  
211 sequence data. *Bioinformatics* 2014; **30**: 2114–2120.
- 212 5. Bankevich A, Nurk S, Antipov D, Gurevich AA, Dvorkin M, Kulikov AS, et al.  
213 SPAdes: a new genome assembly algorithm and its applications to single-cell  
214 sequencing. *J Comput Biol* 2012; **19**: 455–477.
- 215 6. Matsumi R, Manabe K, Fukui T, Atomi H, Imanaka T. Disruption of a sugar transporter  
216 gene cluster in a hyperthermophilic archaeon using a host-marker system based on  
217 antibiotic resistance. *J Bacteriol* 2007; **189**: 2683–2691.
- 218 7. Li H, Durbin R. Fast and accurate short read alignment with Burrows-Wheeler  
219 transform. *Bioinformatics* 2009; **25**: 1754–1760.
- 220 8. Li H, Handsaker B, Wysoker A, Fennell T, Ruan J, Homer N, et al. The Sequence  
221 Alignment/Map format and SAMtools. *Bioinformatics* 2009; **25**: 2078–2079.

- 222 9. McKenna A, Hanna M, Banks E, Sivachenko A, Cibulskis K, Kernytzky A, et al. The  
223 Genome Analysis Toolkit: a MapReduce framework for analyzing next-generation  
224 DNA sequencing data. *Genome Res* 2010; **20**: 1297–1303.
- 225 10. Long H, Behringer MG, Williams E, Te R, Lynch M. Similar mutation rates but highly  
226 diverse mutation spectra in ascomycete and basidiomycete yeasts. *Genome Biol Evol*  
227 2016; **8**: 3815–3821.
- 228 11. DePristo MA, Banks E, Poplin R, Garimella KV, Maguire JR, Hartl C, et al. A  
229 framework for variation discovery and genotyping using next-generation DNA  
230 sequencing data. *Nat Genet* 2011; **43**: 491–498.
- 231 12. Van der Auwera GA, Carneiro MO, Hartl C, Poplin R, Del Angel G, Levy-Moonshine  
232 A, et al. From FastQ data to high confidence variant calls: the Genome Analysis Toolkit  
233 best practices pipeline. *Curr Protoc Bioinformatics* 2013; **43**: 11.10.1-33.
- 234 13. Singh VK, Mangalam AK, Dwivedi S, Naik S. Primer premier: program for design of  
235 degenerate primers from a protein sequence. *BioTechniques* 1998; **24**: 318–319.
- 236 14. Sun Y, Powell KE, Sung W, Lynch M, Moran MA, Luo H. Spontaneous mutations of a  
237 model heterotrophic marine bacterium. *ISME J* 2017; **11**: 1713–1718.
- 238 15. Rocha EPC. Neutral theory, microbial practice: challenges in bacterial population  
239 genetics. *Mol Biol Evol* 2018; **35**: 1338–1347.
- 240 16. Arevalo P, VanInsberghe D, Elsherbini J, Gore J, Polz MF. A reverse ecology approach  
241 based on a biological definition of microbial populations. *Cell* 2019; **178**: 820–834.

- 242 17. Emms DM, Kelly S. OrthoFinder: solving fundamental biases in whole genome  
243 comparisons dramatically improves orthogroup inference accuracy. *Genome Biol* 2015;  
244 **16**: 157.
- 245 18. Katoh K, Standley DM. MAFFT multiple sequence alignment software version 7:  
246 Improvements in performance and usability. *Mol Biol Evol* 2013; **30**: 772–780.
- 247 19. Yang Z. PAML 4: phylogenetic analysis by maximum likelihood. *Mol Biol Evol* 2007;  
248 **24**: 1586–1591.
- 249 20. Sun Y, Luo H. Homologous recombination in core genomes facilitates marine bacterial  
250 adaptation. *Appl Environ Microbiol* 2018; **84**: e02545-17.
- 251 21. O’Leary NA, Wright MW, Brister JR, Ciufu S, Haddad D, McVeigh R, et al. Reference  
252 sequence (RefSeq) database at NCBI: current status, taxonomic expansion, and  
253 functional annotation. *Nucleic Acids Res* 2016; **44**: D733-745.
- 254 22. Bobay L-M, Ellis BS-H, Ochman H. ConSpeciFix: classifying prokaryotic species  
255 based on gene flow. *Bioinformatics* 2018; **34**: 3738–3740.
- 256 23. Bobay L-M, Ochman H. Biological species are universal across life’s domains. *Genome*  
257 *Biol Evol* 2017; **9**: 491–501.
- 258 24. R Development Core Team. R: A language and environment for statistical computing. R  
259 Foundation for Statistical Computing, Vienna, Vienna, Austria.
- 260 25. Fox J, Weisberg S. An R Companion to Applied Regression, Third Edition. 2019. Sage,  
261 Thousand Oaks CA.

- 262 26. Pagel M. Inferring the historical patterns of biological evolution. *Nature* 1999; **401**:  
263 877–884.
- 264 27. Orme D. The caper package: comparative analysis of phylogenetics and evolution in R.  
265 2013; 36.
- 266 28. Nguyen L-T, Schmidt HA, von Haeseler A, Minh BQ. IQ-TREE: a fast and effective  
267 stochastic algorithm for estimating maximum-likelihood phylogenies. *Mol Biol Evol*  
268 2015; **32**: 268–274.
- 269 29. Kalyaanamoorthy S, Minh BQ, Wong TKF, von Haeseler A, Jermin LS. ModelFinder:  
270 fast model selection for accurate phylogenetic estimates. *Nat Methods* 2017; **14**: 587–  
271 589.
- 272 30. Powell LE, Isler K, Barton RA. Re-evaluating the link between brain size and  
273 behavioural ecology in primates. *Philos Trans R Soc Lond, B, Biol Sci* 2017; **284**:  
274 20171765.
- 275 31. Harrison TL, Simonsen AK, Stinchcombe JR, Frederickson ME. More partners, more  
276 ranges: generalist legumes spread more easily around the globe. *Biol Lett* 2018; **14**:  
277 20180616.  
278
